# Supplementary material for: Feasibility and safety of oxygen-free nasal high flow therapy in the acute postoperative period: a single-center randomized feasibility study
Source: Research Square preprint supplement (doi:10.21203/rs.3.rs-8682927/v1), 2026-02-12
Supplement: Supplementary file 1 [file 0644ccee14091e5e8c4eb1b2.docx]

Table 3. Summary of Time-weighted

|  |  | | Mean difference (95% CI) | | |
| --- | --- | --- | --- | --- | --- |
| Outcomes | Group | Mean (SD) | NHF vs. FM oxygen | NHF vs. Control | FM oxygen vs. Control |
| RR | NHF (N = 14) | 11.1 (2.8) | -2.8 (-5.0 to -0.6) | -3.6 (-5.7 to -1.4) | 0.8 (-1.4 to 2.9) |
|  | FM oxygen (N = 14) | 14.7 (2.7) |  |  |  |
|  | Control (N = 15) | 13.9 (3.0) |  |  |  |
| pO2 | NHF (N = 13) | 89.8 (8.8) | -45.1 (-60.5 to -29.7) | -3.9 (-15.6 to 7.9) | -41.3 (-58.9 to -23.7) |
|  | FM oxygen (N = 14) | 134.9 (25.6) |  |  |  |
|  | Control (N = 16) | 93.6 (20.5) |  |  |  |
| SpO2 | NHF (N = 14) | 96.3 (1.1) | -2.3 (-3.1 to -1.6) | 0.04 (-0.8 to 0.9) | -2.4 (-3.2 to -1.6) |
|  | FM oxygen (N = 14) | 96.3 (1.2) |  |  |  |
|  | Control (N = 15) | 98.7 (0.9) |  |  |  |
| pCO2 | NHF (N = 13) | 55.0 (15.9) | -0.4 (-11.2 to 10.3) | 2.8 (-8.0 to 13.5) | -3.2 (-10.9 to 4.6) |
|  | FM oxygen (N = 14) | 52.2 (10.8) |  |  |  |
|  | Control (N = 16) | 55.4 (10.0) |  |  |  |
| PR | NHF (N = 14) | 70.8 (9.9) | -3.5 (-11.4 to 4.5) | -8.7 (-16.8 to -0.7) | 5.3 (-3.0 to 13.6) |
|  | FM oxygen (N = 14) | 79.5 (10.9) |  |  |  |
|  | Control (N = 15) | 74.2 (10.9) |  |  |  |
