# Supplementary material for: Feasibility and safety of oxygen-free nasal high flow therapy in the acute postoperative period: a single-center randomized feasibility study
Source: Research Square preprint supplement (doi:10.21203/rs.3.rs-8682927/v1), 2026-02-12
Supplement: Supplementary file 2 [file 666b0d55d99ae933025f5646.docx]

Table 2. Summary of Incident

|  |  | | Association measures | | |
| --- | --- | --- | --- | --- | --- |
| Outcomes | Group | n (%) | Comparison | Risk difference (95% CI) | Risk ratio (95% CI) |
| Hypercapnia 60 | NHF (N = 14) | 4 (29%) | NHF vs. FM oxygen | -4.8 (-38.4 to 28.8) | 0.9 (0.3 to 2.6) |
|  | FM oxygen (N = 15) | 5 (33%) | NHF vs. Control | -2.7 (-35.5 to 30.1) | 0.9 (0.3 to 2.8) |
|  | Control (N = 16) | 5 (31%) | FM oxygen vs. Control | -2.1 (-35.0 to 30.9) | 0.9 (0.3 to 2.6) |
| Hypercapnia 50 | NHF (N = 14) | 8 (57%) | NHF vs. FM oxygen | -16.2 (-50.4 to 18.1) | 0.8 (0.5 to 1.4) |
|  | FM oxygen (N = 15) | 10 (63%) | NHF vs. Control | -5.4 (-40.5 to 29.8) | 0.9 (0.5 to 1.7) |
|  | Control (N = 16) | 11 (73%) | FM oxygen vs. Control | -10.8 (-43.5 to 21.8) | 0.9 (0.5 to 1.4) |
| Low SpO2 <= 90% | NHF (N = 14) | 1 (7.1%) | NHF vs. FM oxygen | 7.1 (-6.4 to 20.6) | NC (Not calculated) |
|  | FM oxygen (N = 15) | 0 (0%) | NHF vs. Control | 0.9 (-17.1 to 18.9) | 1.1 (0.1 to 16.6) |
|  | Control (N = 16) | 1 (6.3%) | FM oxygen vs. Control | 6.3 (-5.6 to 18.1) | NC (Not calculated) |
| High SpO2 >= 99% | NHF (N = 14) | 4 (29%) | NHF vs. FM oxygen | -64.7 (-91.6 to -37.9) | 0.3 (0.1 to 0.7) |
|  | FM oxygen (N = 15) | 14 (93%) | NHF vs. Control | 9.8 (-20.6 to 40.3) | 1.5 (0.4 to 5.7) |
|  | Control (N = 16) | 3 (19%) | FM oxygen vs. Control | -74.6 (-97.5 to -51.7) | 0.2 (0.1 to 0.6) |
