# Supplementary material for: Feasibility and safety of oxygen-free nasal high flow therapy in the acute postoperative period: a single-center randomized feasibility study
Source: Research Square preprint supplement (doi:10.21203/rs.3.rs-8682927/v1), 2026-02-12
Supplement: Supplementary file 3 [file dd8a44daaacf86e83c77d54b.docx]

| Table 1. Patients’ Background Summary | | |  |  |  |  |
| --- | --- | --- | --- | --- | --- | --- |
|  |  |  |  |  |  |  |
|  | FM oxygen (n=16) | | NHF (n=15) | | Control (n=16) | |
|  | Mean | SD | Mean | SD | Mean | SD |
| Age | 35.10 | 11.90 | 38.20 | 16.20 | 38.50 | 11.50 |
| Height | 166.40 | 7.90 | 161.60 | 6.50 | 165.30 | 8.50 |
| BW | 60.80 | 9.40 | 57.80 | 9.60 | 60.20 | 13.10 |
| BMI | 21.80 | 2.40 | 22.10 | 2.30 | 22.00 | 2.20 |
| Sex | Male: 10 | Female:7 | Male: 6 | Female:10 | Male: 9 | Female:7 |
| FEV₁（L） | 3.41 | 0.75 | 2.96 | 0.74 | 3.34 | 0.77 |
| FVC（L） | 3.94 | 0.75 | 3.56 | 0.92 | 3.81 | 0.85 |
| FEV₁％（％） | 86.50 | 7.41 | 77.80 | 21.20 | 85.90 | 6.03 |
| FEV₁（％） | 99.70 | 11.50 | 94.30 | 27.20 | 100.80 | 11.10 |
| Anesthesia time | 186.00 | 97.00 | 168.80 | 60.70 | 183.80 | 34.10 |
| Operation time | 105.10 | 85.10 | 94.00 | 59.80 | 107.80 | 32.40 |
| AOS cases | 10 | | 10 | | 10 | |
| TIVA cases | 6 | | 5 | | 6 | |
